# Supplementary material for: Monitoring Blood Immune Cells in Patients with Advanced Small Cell Lung Cancer Undergoing a Combined Immune Checkpoint Inhibitor/Chemotherapy
Source: MDPI journal article supplement (doi:10.3390/biom13020190), 2023-01-17
Supplement: s1 [file s1]

**Suppl. Figure S1.** Relationship between risk factors/baseline immune cell parameters and OS in 84 NSCLC patients based on cutoffs of the SCLC group. Mean survival time and p value of the log rank test are given.

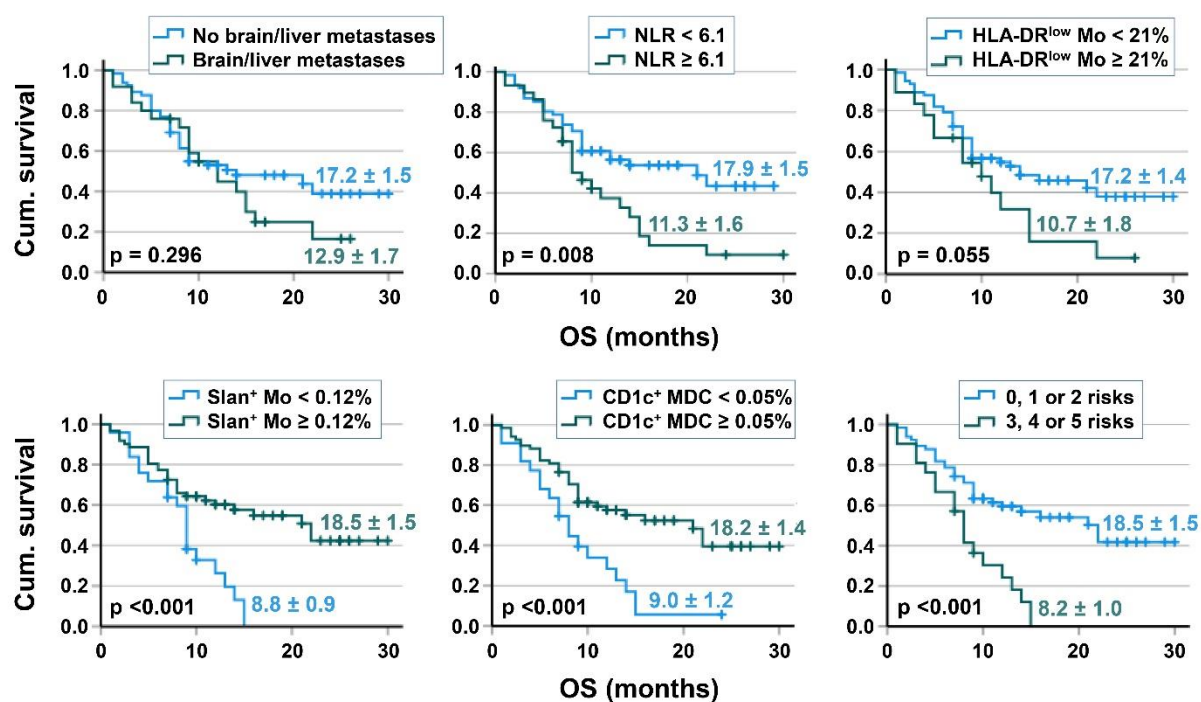

**Table S1.** Comparison of baseline and third cycle values of blood immune cells in 33 SCLC patients with therapy response to chemo/immunotherapy. Median and interquartile range are given. Bold values highlight significant differences in Wilcoxon test.

| Parameters                                         | Baseline      | Third cycle   | <i>P value</i> |
|----------------------------------------------------|---------------|---------------|----------------|
| Neutrophil counts (cells/ $\mu$ l)                 | 7600 (3500)   | 9090 (6825)   | <b>0.043</b>   |
| Lymphocyte counts (cells/ $\mu$ l)                 | 1690 (3500)   | 2070 (1255)   | 0.051          |
| NLR                                                | 5.1 (6.7)     | 4.9 (3.8)     |                |
| CD3+ T cells                                       | 1098 (1156)   | 1560 (985)    | <b>0.019</b>   |
| CD19+ B cells                                      | 180 (172)     | 163 (190)     |                |
| NK cells                                           | 245 (242)     | 198 (160)     |                |
| Monocytes (cells/ $\mu$ l)                         | 660 (467)     | 850 (340)     | <b>0.032</b>   |
| HLA-DR <sup>low</sup> MDSC<br>(% of monocytes)     | 7.4 (10.4)    | 8.5 (13.3)    |                |
| Slan+ non-classical monocytes<br>(% of leukocytes) | 0.227 (0.485) | 0.219 (0.376) |                |
| CD1c+ MDC<br>(% of leukocytes)                     | 0.07 (0.068)  | 0.109 (0.155) | <b>0.004</b>   |
| CD141+ MDC<br>(% of leukocytes)                    | 0.004 (0.005) | 0.006 (0.006) |                |
| CD303+ PDC<br>(% of leukocytes)                    | 0.051 (0.072) | 0.069 (0.074) |                |
| Sum of MDC/PDC<br>(% of leukocytes)                | 0.126 (0.147) | 0.186 (0.187) | <b>0.008</b>   |

**Table S2.** Comparison of blood immune cells in SCLC patients with or without brain/liver metastases. Median and interquartile range are given. Bold values highlight significant differences in Mann Whitney U test.

| Parameters                                      | No brain/liver metastases | brain/liver metastases | <i>P value</i> |
|-------------------------------------------------|---------------------------|------------------------|----------------|
| n                                               | 17                        | 23                     |                |
| Neutrophil counts (cells/ $\mu$ l)              | 6880 (2555)               | 9050 (8420)            |                |
| Lymphocyte counts (cells/ $\mu$ l)              | 1560 (1075)               | 1560 (1034)            |                |
| NLR                                             | 4.9 (4.4)                 | 6.9 (8.9)              | 0.066          |
| CD3+ T cells                                    | 1136 (1112)               | 1024 (922)             |                |
| CD19+ B cells                                   | 186 (176)                 | 170 (167)              |                |
| NK cells                                        | 255 (252)                 | 201 (179)              |                |
| Monocytes (cells/ $\mu$ l)                      | 665 (501)                 | 660 (510)              |                |
| HLA-DR <sup>low</sup> MDSC<br>(% of monocytes)  | 5.3 (9.1)                 | 12.2 (24.5)            | <b>0.034</b>   |
| Slan+ non-classical monocytes (% of leukocytes) | 0.30 (0.36)               | 0.19 (0.61)            |                |
| CD1c+ MDC (% of leukocytes)                     | 0.07 (0.048)              | 0.031 (0.079)          |                |
| CD141+ MDC (% of leukocytes)                    | 0.004 (0.003)             | 0.002 (0.005)          |                |
| CD303+ PDC (% of leukocytes)                    | 0.05 (0.08)               | 0.05 (0.06)            |                |
| Sum of MDC/PDC<br>(% of leukocytes)             | 0.124 (0.111)             | 0.086 (0.135)          |                |

**Table S3.** Relationship between baseline immune-cell parameters with patients' OS for 34 SCLC patients responding to chemo/immunotherapy. Data of univariate prognostic factor analysis is provided with estimated mean of survival  $\pm$  standard error, hazard ratios (HR) with 95% confidence interval (CI) and *p* values.

|                                             | Cutoff           | n  | Kaplan-Meier OS |                  |                | Cox Regression, OS |           |                |
|---------------------------------------------|------------------|----|-----------------|------------------|----------------|--------------------|-----------|----------------|
|                                             |                  |    | % censored      | OS (months)      | <i>p</i> value | HR                 | 95% CI    | <i>p</i> value |
| Neutrophil counts (cells/ $\mu$ l)          | $\leq 10,000$    | 28 | 25              | $12.6 \pm 1.28$  | <b>0.018</b>   |                    | 1.1-7.5   | <b>0.031</b>   |
|                                             | $> 10,000$       | 6  | 0               | $7.67 \pm 1.2$   |                | 2.87               |           |                |
| NLR                                         | $< 6.1$          | 19 | 31.6            | $14.0 \pm 1.69$  | <b>0.009</b>   |                    | 1.18-6.26 | <b>0.019</b>   |
|                                             | $\geq 6.1$       | 15 | 6.7             | $8.67 \pm 0.77$  |                | 2.72               |           |                |
| HLA-DR <sup>low</sup> MDSC (% of monocytes) | $< 21$           | 29 | 24.1            | $12.3 \pm 1.26$  | 0.112          |                    | 0.77-5.66 | 0.150          |
|                                             | $\geq 21$        | 5  | 0               | $8.2 \pm 1.39$   |                | 2.084              |           |                |
| Slan+ monocytes (% of leukocytes)           | $< 0.12$         | 10 | 0               | $8.2 \pm 1.05$   | <b>0.023</b>   | 2.36               | 1.04-5.36 | <b>0.040</b>   |
|                                             | $\geq 0.12$      | 24 | 29.2            | $13.3 \pm 1.44$  |                |                    |           |                |
| CD1c+ MDC (% of leukocytes)                 | $< 0.05$         | 15 | 13.3            | $9.4 \pm 1.19$   | 0.140          | 1.70               | 0.79-3.67 | 0.173          |
|                                             | $\geq 0.05$      | 19 | 26.3            | $13.2 \pm 1.56$  |                |                    |           |                |
| Baseline risk score (5 factors)             | 0-2 risk factors | 22 | 31.8            | $13.76 \pm 1.53$ | <b>0.006</b>   |                    | 1.24-6.31 | <b>0.013</b>   |
|                                             | 3-5 risk factors | 12 | 0               | $8.17 \pm 0.9$   |                | 2.80               |           |                |

**Table S4.** Relationship between third-cycle blood immune cell parameters with patients' OS for 35 SCLC patients. Data of univariate prognostic factor analysis is provided, with estimated mean of overall survival  $\pm$  standard error, hazard ratios (HR) with 95% confidence interval (CI) and *p* values.

|                                             | Cutoff        | n  | Kaplan-Meier OS |                 |                  | Cox Regression, OS |            |                |
|---------------------------------------------|---------------|----|-----------------|-----------------|------------------|--------------------|------------|----------------|
|                                             |               |    | % censored      | OS (months)     | <i>p</i> value   | HR                 | 95% CI     | <i>p</i> value |
| Neutrophil counts (cells/ $\mu$ l)          | $\leq 10,000$ | 21 | 28.6            | $13.2 \pm 1.4$  | 0.076            |                    | 0.88-3.93  | 0.101          |
|                                             | $> 10,000$    | 14 | 7.1             | $9.2 \pm 1.4$   |                  | 1.86               |            |                |
| NLR                                         | $< 6.1$       | 23 | 26.1            | $13.3 \pm 1.4$  | <b>0.045</b>     |                    | 0.94-4.61  | 0.07           |
|                                             | $\geq 6.1$    | 12 | 8.3             | $8.5 \pm 1.15$  |                  | 2.08               |            |                |
| HLA-DR <sup>low</sup> MDSC (% of monocytes) | $< 21$        | 31 | 22.6            | $12.4 \pm 1.1$  | <b>0.011</b>     |                    | 1.17-10.4  | <b>0.025</b>   |
|                                             | $\geq 21$     | 4  | 0               | $5.8 \pm 1.9$   |                  | 3.49               |            |                |
| Slan+ monocytes (% of leukocytes)           | $< 0.12$      | 13 | 7.7             | $8.6 \pm 1.3$   | <b>0.018</b>     | 2.32               | 1.08-5.0   | <b>0.032</b>   |
|                                             | $\geq 0.12$   | 22 | 27.3            | $13.5 \pm 1.4$  |                  |                    |            |                |
| CD1c+ MDC (% of leukocytes)                 | $< 0.05$      | 9  | 0               | $6.8 \pm 1.3$   | <b>&lt;0.001</b> | 3.51               | 1.53-8.04  | <b>0.003</b>   |
|                                             | $\geq 0.05$   | 29 | 26.9            | $13.4 \pm 1.25$ |                  |                    |            |                |
| CD141+ MDC (% of leukocytes)                | $< 0.0015$    | 7  | 0               | $5.9 \pm 1.45$  | <b>&lt;0.001</b> | 3.86               | 1.59-9.37  | <b>0.003</b>   |
|                                             | $\geq 0.0015$ | 28 | 25              | $12.9 \pm 1.2$  |                  |                    |            |                |
| PDC (% of leukocytes)                       | $< 0.014$     | 6  | 0               | $5.7 \pm 1.45$  | <b>&lt;0.001</b> | 4.57               | 1.76-11.88 | <b>0.002</b>   |
|                                             | $\geq 0.014$  | 29 | 24.1            | $12.9 \pm 1.2$  |                  |                    |            |                |

**Table S5.** Baseline blood immune cells parameters of SCLC compared to NSCLC histotypes. Data represent median and interquartile range (IQR), results of Mann-Whitney U-test are shown.

|                                                    | SCLC          | NSCLC         | <i>P value</i>   |
|----------------------------------------------------|---------------|---------------|------------------|
| n                                                  | 40            | 83            |                  |
| Neutrophil counts<br>(cells/ $\mu$ l)              | 7680 (5155)   | 6590 (5330)   |                  |
| Lymphocyte counts (cells/ $\mu$ l)                 | 1560 (1018)   | 1650 (740)    |                  |
| NLR                                                | 6.12 (7.1)    | 3.96 (4.42)   | <b>0.04</b>      |
| T cells (cells/ $\mu$ l)                           | 1051 (1024)   | 1110 (690)    |                  |
| B cells (cells/ $\mu$ l)                           | 178 (172)     | 111 (156)     | 0.05             |
| NK cells (cells/ $\mu$ l)                          | 204 (226)     | 255 (310)     | <b>0.009</b>     |
| Monocytes                                          | 660 (483)     | 705 (356)     |                  |
| HLA-DR <sup>low</sup> MDSC (% of<br>monocytes)     | 9.6 (17.2)    | 6.9 (14.2)    |                  |
| Slan+ non-classical monocytes<br>(% of leukocytes) | 0.23 (0.46)   | 0.23 (0.45)   |                  |
| CD1c+ MDC (% of leukocytes)                        | 0.048 (0.069) | 0.099 (0.096) | <b>0.002</b>     |
| CD141+ MDC (% of<br>leukocytes)                    | 0.003 (0.005) | 0.006 (0.006) | <b>&lt;0.001</b> |
| PDC (% of leukocytes)                              | 0.05 (0.07)   | 0.077 (0.091) | <b>&lt;0.001</b> |
| MDC/PDC sum                                        | 0.10 (0.13)   |               |                  |
